# Supplementary material
Source: ML conference proceedings conference paper supplement (https://proceedings.mlr.press/v37/heinrich15.html)
Supplement: Supplementary file [file heinrich15-supp.pdf]

## A Proofs

**Lemma 6.** Let  $\pi$  and  $\beta$  be two behavioural strategies,  $\Pi$  and  $B$  two mixed strategies that are realization equivalent to  $\pi$  and  $\beta$ , and  $\lambda_1, \lambda_2 \in \mathbb{R}_{\geq 0}$  with  $\lambda_1 + \lambda_2 = 1$ . Then for each information state  $u \in \mathcal{U}$ ,

$$\mu(u) = \pi(u) + \frac{\lambda_2 x_\beta(\sigma_u)}{\lambda_1 x_\pi(\sigma_u) + \lambda_2 x_\beta(\sigma_u)} (\beta(u) - \pi(u))$$

defines a behavioural strategy  $\mu$  at  $u$  and  $\mu$  is realization equivalent to the mixed strategy  $M = \lambda_1 \Pi + \lambda_2 B$ .

*Proof.* The realization plan of  $M = \lambda_1 \Pi + \lambda_2 B$  is

$$x_M(\sigma_u) = \lambda_1 x_\Pi(\sigma_u) + \lambda_2 x_B(\sigma_u), \quad \forall u \in \mathcal{U}.$$

and due to realization-equivalence,  $x_\Pi(\sigma_u) = x_\pi(\sigma_u)$  and  $x_B(\sigma_u) = x_\beta(\sigma_u) \forall u \in \mathcal{U}$ . This realization plan induces a realization equivalent behavioural strategy

$$\begin{aligned} \mu(u, a) &= \frac{x_M(\sigma_u a)}{x_M(\sigma_u)} \\ &= \frac{\lambda_1 x_\pi(\sigma_u a) + \lambda_2 x_\beta(\sigma_u a)}{\lambda_1 x_\pi(\sigma_u) + \lambda_2 x_\beta(\sigma_u)} \\ &= \frac{\lambda_1 x_\pi(\sigma_u) \pi(u, a) + \lambda_2 x_\beta(\sigma_u) \beta(u, a)}{\lambda_1 x_\pi(\sigma_u) + \lambda_2 x_\beta(\sigma_u)} \\ &= \pi(u, a) + \frac{\lambda_2 x_\beta(\sigma_u) (\beta(u, a) - \pi(u, a))}{\lambda_1 x_\pi(\sigma_u) + \lambda_2 x_\beta(\sigma_u)}. \end{aligned}$$

□

**Theorem 7.** Let  $\pi_1$  be an initial behavioural strategy profile. The extensive-form process

$$\begin{aligned} \beta_{t+1}^i &\in b_{\epsilon_{t+1}}^i(\pi_t^{-i}), \\ \pi_{t+1}^i(u) &= \pi_t^i(u) + \frac{\alpha_{t+1} x_{\beta_{t+1}^i}(\sigma_u) (\beta_{t+1}^i(u) - \pi_t^i(u))}{(1 - \alpha_{t+1}) x_{\pi_t^i}(\sigma_u) + \alpha_{t+1} x_{\beta_{t+1}^i}(\sigma_u)} \end{aligned}$$

for all players  $i \in \mathcal{N}$  and all their information states  $u \in \mathcal{U}^i$ , with  $\alpha_t \rightarrow 0$  and  $\epsilon_t \rightarrow 0$  as  $t \rightarrow \infty$ , and  $\sum_{t=1}^{\infty} \alpha_t = \infty$ , is realization-equivalent to a generalised weakened fictitious play in the normal-form and therefore the average strategy profile converges to a Nash equilibrium in all games with the fictitious play property.

*Proof.* By induction. Assume  $\pi_t$  and  $\Pi_t$  are realization equivalent and  $\beta_{t+1} \in b_{\epsilon_{t+1}}(\pi_t)$  is an  $\epsilon_{t+1}$ -best response to  $\pi_t$ . By Kuhn's Theorem, let  $B_{t+1}$  be any mixed strategy that is realization equivalent to  $\beta_{t+1}$ . Then  $B_{t+1}$  is an  $\epsilon_{t+1}$ -best response to  $\Pi_t$  in the normal-form. By Lemma 6, the update in behavioural policies,  $\pi_{t+1}$ , is realization equivalent to the following update in mixed strategies

$$\Pi_{t+1} = (1 - \alpha_{t+1}) \Pi_t + \alpha_{t+1} B_{t+1}$$

and thus follows a generalised weakened fictitious play. □

## B Algorithms

---

### Algorithm 3 FSP with FQI and simple counting model

---

Instantiate functions FICTITIOUSSELFPLAY and GENERATEDATA as in algorithm 2

**function** UPDATERLMEMORY( $\mathcal{M}_{RL}^i, \mathcal{D}^i$ )

$\mathcal{T} \leftarrow$  Extract from  $\mathcal{D}^i$  episodes that consist of transitions  $(u_t, a_t, r_{t+1}, u_{t+1})$  from player  $i$ 's point of view. Add  $\mathcal{T}$  to  $\mathcal{M}_{RL}^i$ , replacing oldest data if the memory is full.

**return**  $\mathcal{M}_{RL}^i$

**end function**

**function** UPDATESLMEMORY( $\mathcal{M}_{SL}^i, \mathcal{D}^i$ )

$\mathcal{D}_\beta^i \leftarrow$  Extract all episodes from  $\mathcal{D}^i$  where player  $i$  chose their approximate best response strategy.

$\mathcal{B} \leftarrow$  Extract from  $\mathcal{D}_\beta^i$  data that consist of pairs  $(u_t, \mu_t)$ , where  $\mu_t$  is player  $i$ 's strategy at information state  $u_t$  at the time of sampling the respective episode.

**return**  $\mathcal{B}$

**end function**

**function** REINFORCEMENTLEARNING( $\mathcal{M}_{RL}^i$ )

Initialize FQI with previous iteration's  $Q$ -values.

$\beta \leftarrow$  FQI( $\mathcal{M}_{RL}^i$ )

**return**  $\beta$

**end function**

**function** SUPERVISEDLEARNING( $\mathcal{M}_{SL}^i$ )

Initialize counting model from previous iteration.

**for** each  $(u_t, \mu_t)$  in  $\mathcal{M}_{SL}^i$  **do**

$\forall a \in \mathcal{A}(u_t) : N(u_t, a) \leftarrow N(u_t, a) + \mu_t(a)$

$\forall a \in \mathcal{A}(u_t) : \pi(u_t, a) \leftarrow \frac{N(u_t, a)}{N(u_t)}$

**end for**

**return**  $\pi$

**end function**

---

## C River Poker

In our experiments, one instance of River poker implements a Texas Hold'em scenario, where the first player called a raise pre flop, check/raised on the flop and bet the turn. The community cards were set to KhTc7d5sJh. The players' distributions assume that player 1 likely holds one combination of "K4s-K2s, KTo-K3o, QTo-Q9o, J9o+, T9o, T7o, 98o, 96o" with probability 0.99 and a uniform random holding with probability 0.01. Similarly, player 2 is likely to hold one combination of "QQ-JJ, 99-88, 66, AQs-A5s, K6s, K4s-K2s, QTs, Q7s, JTs, J7s, T8s+, T6s-T2s, 97s, 87s, 72s+, AQo-A5o, K6o, K4o-K2o, QTo, Q7o, JTo, J7o, T8o+, T6o-T4o, 97o, 87o, 75o+".
